# Supplementary material for: Synthesis, crystal structure, and characterization of charge-transfer salt: (BEDT-TTF)5[Fe(C2O4)3]·(H2O)2·CH2Cl2 (BEDT-TTF = bis(ethylenedithio)tetrathiafulvalene)
Source: Royal Society of Chemistry journal article supplement (doi:10.1039/b910483f), 2009-01-01
Supplement: b910483f.pdf [file b910483f.pdf]

Electronic Supplementary Information

**Synthesis, Crystal Structure, and Characterization of**  
**Charge-transfer Salt: (BEDT-TTF)<sub>5</sub>[Fe(C<sub>2</sub>O<sub>4</sub>)<sub>3</sub>](H<sub>2</sub>O)<sub>2</sub>·CH<sub>2</sub>Cl<sub>2</sub>**  
**( BEDT-TTF = bis (ethylenedithio)tetrathiafulvalene )**

Zhang, Bin; Zhang, Yan; Liu, Fen; Guo, Yanjun

**Table S1** Selected bond lengths at 180K

|             |          |             |          |              |          |
|-------------|----------|-------------|----------|--------------|----------|
| Fe(1)–O(2)  | 1.990(3) | Fe(1)–O(10) | 1.998(3) | Fe(1)–O(6)   | 2.009(3) |
| Fe(1)–O(5)  | 2.009(2) | Fe(1)–O(9)  | 2.010(3) | Fe(1)–O(1)   | 2.014(3) |
| S(1)–C(1)   | 1.736(4) | S(1)–(3)    | 1.745(4) | S(2)–C(4)    | 1.739(4) |
| S(2)–C(1)   | 1.742(4) | S(3)–(2)    | 1.733(4) | S(3)–C(5)    | 1.749(4) |
| S(4)–C(2)   | 1.732(4) | S(4)–C(6)   | 1.753(4) | S(5)–C(3)    | 1.736(4) |
| S(5)–C(7)   | 1.816(4) | S(6)–C(4)   | 1.744(4) | S(6)–C(8)    | 1.803(4) |
| S(7)–C(5)   | 1.734(4) | S(7)–C(9)   | 1.813(4) | S(8)–C(6)    | 1.740(4) |
| S(8)–C(10)  | 1.804(4) | C(1)–C(2)   | 1.362(5) | C(3)–C(4)    | 1.352(5) |
| C(5)–C(6)   | 1.357(5) | C(7)–C(8)   | 1.520(5) | C(9)–C(10)   | 1.497(5) |
| S(9)–C(11)  | 1.739(4) | S(9)–C(13)  | 1.745(4) | S(10)–C(11)  | 1.743(4) |
| S(10)–C(14) | 1.748(4) | S(11)–C(12) | 1.730(4) | S(11)–C(15)  | 1.745(4) |
| S(12)–C(12) | 1.731(4) | S(12)–C(16) | 1.739(4) | S(13)–C(13)  | 1.733(4) |
| S(13)–C(17) | 1.805(4) | S(14)–C(14) | 1.746(4) | S(14)–C(18)  | 1.806(4) |
| S(15)–C(15) | 1.747(4) | S(15)–C(19) | 1.805(4) | S(16)–C(16)  | 1.746(4) |
| S(16)–C(20) | 1.799(4) | C(11)–C(12) | 1.362(5) | C(13)–C(14)  | 1.355(5) |
| C(15)–C(16) | 1.356(5) | C(17)–C(18) | 1.517(5) | C(19)–C(20)  | 1.507(5) |
| S(17)–C(21) | 1.732(4) | S(17)–C(22) | 1.750(4) | S(18)–C(21)  | 1.716(4) |
| S(18)–C(23) | 1.732(4) | S(19)–C(22) | 1.732(4) | S(19)–C(24)  | 1.801(4) |
| S(20)–C(23) | 1.743(4) | S(20)–C(25) | 1.802(4) | C(21)–C(21A) | 1.382(7) |
| C(22)–C(23) | 1.362(5) | C(24)–C(25) | 1.508(5) |              |          |
| S(21)–C(26) | 1.741(4) | S(21)–C(27) | 1.749(4) | S(22)–C(26)  | 1.744(4) |
| S(22)–C(28) | 1.761(4) | S(23)–C(27) | 1.751(4) | S(23)–C(29)  | 1.794(3) |
| S(24)–C(28) | 1.738(4) | S(24)–C(30) | 1.807(4) | C(26)–C(26B) | 1.359(7) |
| C(27)–C(28) | 1.352(5) | C(29)–C(30) | 1.515(5) |              |          |
| S(25)–C(31) | 1.731(4) | S(25)–C(33) | 1.744(4) | S(26)–C(31)  | 1.729(4) |
| S(26)–C(34) | 1.753(4) | S(27)–C(35) | 1.739(4) | S(27)–C(32)  | 1.747(4) |
| S(28)–C(32) | 1.734(4) | S(28)–C(36) | 1.742(4) | S(29)–C(33)  | 1.743(4) |
| S(29)–C(37) | 1.798(4) | S(30)–C(34) | 1.735(4) | S(30)–C(38)  | 1.796(4) |
| S(31)–C(35) | 1.736(4) | S(31)–C(39) | 1.804(4) | S(32)–C(36)  | 1.755(4) |
| S(32)–C(40) | 1.802(4) | C(31)–C(32) | 1.362(5) | C(33)–C(34)  | 1.349(5) |
| C(35)–C(36) | 1.350(5) | C(37)–C(38) | 1.489(5) | C(39)–C(40)  | 1.529(5) |
| S(33)–C(41) | 1.721(4) | S(33)–C(43) | 1.751(4) | S(34)–C(41)  | 1.733(4) |
| S(34)–C(44) | 1.745(4) | S(35)–C(42) | 1.731(4) | S(35)–C(45)  | 1.740(4) |

|             |          |             |          |             |          |
|-------------|----------|-------------|----------|-------------|----------|
| S(36)–C(42) | 1.738(4) | S(36)–C(46) | 1.743(4) | S(37)–C(43) | 1.731(4) |
| S(37)–C(47) | 1.768(5) | S(38)–C(44) | 1.742(4) | S(38)–C(48) | 1.803(4) |
| S(39)–C(45) | 1.736(4) | S(39)–C(49) | 1.797(4) | S(40)–(46)  | 1.731(4) |
| S(40)–C(50) | 1.784(4) | C(41)–C(42) | 1.371(5) | C(43)–C(44) | 1.354(5) |
| C(45)–C(46) | 1.355(5) | C(47)–C(48) | 1.447(6) | C(49)–(50)  | 1.494(5) |

Symmetry Code: A –X, 1-Y, 1-Z; B –X, 1-Y, -Z

**Table S2** Short contacts and hydrogen bonds in **1**

| Short contacts between donors (Å)                     |               |                           |                |                   |               |     |               |
|-------------------------------------------------------|---------------|---------------------------|----------------|-------------------|---------------|-----|---------------|
| S(4)···S(14)_\$1                                      | 3.568(2),     | S(4)···S(20)_\$1          | 3.423(1),      | S(5)···S(15)_\$2  | 3.526(1)      |     |               |
| S(5)···S(18)_\$4                                      | 3.457(2),     | S(5)···S(20)_\$4          | 3.553(2),      | S(6)···S(17)_\$3  | 3.531(1)      |     |               |
| S(6)···S(19)_\$3                                      | 3.487(1),     | S(7)···S(13)_\$2          | 3.465(1),      | S(8)···S(14)_\$1  | 3.581(2)      |     |               |
| S(8)···S(20)_\$1                                      | 3.328(1),     | S(14)···S(16)_\$1         | 3.327(1),      | S(21)···S(40)_\$  | 3.555(1)      |     |               |
| S(22)···S(39)_\$5                                     | 3.399(1),     | S(23)···S(40)_\$6         | 3.401(1),      | S(24)···S(39)_\$5 | 3.326(1)      |     |               |
| S(24)···S(34)_\$7                                     | 3.371(1),     | S(24)···S(38)_\$7         | 3.503(1),      | S(25)···S(31)_\$8 | 3.469(2)      |     |               |
| S(25)···S(39)_\$8                                     | 3.588(1),     | S(40)···S(26)_\$7         | 3.365(2),      | S(26)···S(40)_\$7 | 3.365(2),     |     |               |
| S(27)···S(27)_\$8                                     | 3.600(2),     | S(32)···S(38)_\$7         | 3.522(2),      | S(30)···C(56)_\$7 | 3.492(4)      |     |               |
| S(35)···S(36)_\$10                                    | 3.589(2),     | S(25)···C(39)_\$8         | 3.470(4),      | S(32)···C(46)     | 3.461(4),     |     |               |
| S(38)···C(40)_\$7                                     | 3.467(4)      |                           |                |                   |               |     |               |
| Short contact between donors and solvent molecules(Å) |               |                           |                |                   |               |     |               |
| S(7)···Cl(2)_\$2a                                     | 3.399(4)      | O(4)···S(15)_\$2          | 2.950(3)       | O(8)···S(19)_\$3  | 3.233(3)      |     |               |
| O(7)···S(23)_\$3                                      | 3.285(3)      | O(11)···S(38)_\$7         | 3.258(3)       |                   |               |     |               |
| Hydrogen bonds between donors in a donor layer (Å/°)  |               |                           |                |                   |               |     |               |
| C(17)-H(17B)···S(5)_\$2                               | 3.68/165,     | C(20)-H(20A)···S(19)_\$13 | 3.76/159       |                   |               |     |               |
| C(24)-H(24B)···S(13)                                  | 3.78/153,     | C(25)-H(25B)···S(15)_\$13 | 3.82/161       |                   |               |     |               |
| C(29)-H(29A)···S(31)_\$8                              | 3.62/163,     | C(39)-H(39A)···S(39)      | 3.70/155       |                   |               |     |               |
| C(40)-H(40A)···S(24)_\$8                              | 3.73/156      |                           |                |                   |               |     |               |
| Hydrogen bonds between donors and anions (Å/°)        |               |                           |                |                   |               |     |               |
| C(8)-H(8A)···O(6)_\$2                                 | 3.23/159,     | C(9)-H(9B)···O(12)_\$14   | 3.06/125       |                   |               |     |               |
| C(19)-H(19B)···O(4)_\$2                               | 3.05 /123,    | C(19)-H(19B)···O(14)_\$2  | 3.25/135       |                   |               |     |               |
| C(20)-H(20B)···O(10)_\$12                             | 3.27/135,     | C(24)-H(24A)···O(8)_\$6   | 3.11/133       |                   |               |     |               |
| C(25)-H(25A)···O(13)                                  | 3.46/177,     | C(29)-H(29B)···O(7)_\$6   | 3.05/136       |                   |               |     |               |
| C(40)-H(40B)···O(11)_\$8                              | 3.21/139 ,    | C(49)-H(49A)···O(1)_\$8   | 3.23/138       |                   |               |     |               |
| C(49)-H(49B)···O(9)_\$8                               | 3.23/125,     | C(50)-H(50A)···O(5)_\$8   | 3.24/174       |                   |               |     |               |
| C(17)-H(17A)···Cl(2)                                  | 3.53 /141,    | C(39)-H(39B)···Cl(1)_\$8  | 3.64/153       |                   |               |     |               |
| C(29)-H(29B)···Cl(1)                                  | 3.45/124      |                           |                |                   |               |     |               |
| Symmetry Code:                                        |               |                           |                |                   |               |     |               |
| #1                                                    | 1-x, -y, 1-z; | #2                        | 1-x, 1-y, 1-z; | #3                | 1+x, -1+y, z; | #4  | 1+x, y, z;    |
| #5                                                    | -1+x, y, z;   | #6                        | -1+x,1+y,z;    | #7                | 1-x,-y,-z;    | #8  | 1-x,1-y,-z;   |
| #9                                                    | -x,-y, -z;    | #10                       | 2-x, -y, -z;   | #11               | x, -1+y, z;   | #12 | 1-x, -y, 1-z; |
| #13                                                   | -x,1-y,1-z;   | #14                       | x,1+y,z.       |                   |               |     |               |

**Table S3** Bond Lengths of the TTF Core on the BEDT-TTF molecule

( a –d were defined as follows)

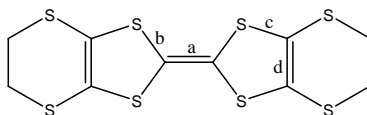

$$\delta = ( b + c ) - ( a + d )$$

$$Q = 6.347 - 7.463$$

| C atom of donor | a     | b                            | c                            | d              | $\delta$ | Q    | Formal charge |
|-----------------|-------|------------------------------|------------------------------|----------------|----------|------|---------------|
| C1-C10          | 1.367 | 1.739, 1.735<br>1.733, 1.727 | 1.739, 1.735<br>1.733, 1.727 | 1.337<br>1.344 | 0.772    | 0.68 | ~ +0.5        |
| C11-C20         | 1.356 | 1.744, 1.743<br>1.731, 1.725 | 1.736, 1.743<br>1.745, 1.740 | 1.351<br>1.345 | 0.773    | 0.67 | ~ +0.5        |
| C21-C25         | 1.384 | 1.724, 1.718                 | 1.747, 1.741                 | 1.351          | 0.73     | 0.99 | ~ +1.0        |
| C26-C30         | 1.384 | 1.724, 1.718                 | 1.747, 1.741                 | 1.351          | 0.73     | 0.99 | ~ +1.0        |
| C31-C40         | 1.364 | 1.733, 1.743<br>1.733, 1.728 | 1.736, 1.743<br>1.744, 1.746 | 1.352<br>1.340 | 0.766    | 0.72 | ~ +0.5        |
| C41-C50         | 1.355 | 1.735, 1.748<br>1.722, 1.735 | 1.730, 1.734<br>1.738, 1.758 | 1.354<br>1.333 | 0.7766   | 0.64 | ~ +0.5        |
